# Supplementary material for: Microwave assisted synthesis of silicalite—power delivery and energy consumption
Source: Royal Society of Chemistry journal article supplement (doi:10.1039/b809694e), 2008-01-01
Supplement: b809694e.pdf [file b809694e.pdf]

## Microwave assisted synthesis of silicalite - Power delivery and energy consumption

Ko-Yeol Choi<sup>\*a</sup>, Geoffrey Tompsett<sup>b</sup> and W. Curtis Conner<sup>b</sup>

<sup>\*a</sup> Department of Chemical Engineering, Seoul National University of Technology,  
172 Gongneung-dong, Nowon-gu, Seoul 139-743, Korea;  
E-mail: [kychoi@snut.ac.kr](mailto:kychoi@snut.ac.kr)

<sup>b</sup> Department of Chemical Engineering, University of Massachusetts Amherst,  
MA 01003, USA. Fax: 1-413-545-1647; Tel: 1-413-545-0316;  
E-mail: [wconner@ecs.umass.edu](mailto:wconner@ecs.umass.edu)

### Content

|                                                                                                                                                                                                                                                       |    |
|-------------------------------------------------------------------------------------------------------------------------------------------------------------------------------------------------------------------------------------------------------|----|
| <b>Table S1</b> Reaction temperature programs used in the microwave oven for the synthesis of silicalite.....                                                                                                                                         | S2 |
| <b>Fig. S1</b> SEM photographs of silicalites synthesized in the microwave oven with a fast temperature ramp rate for (A) 30 min, (B) 60 min, (C) 90 min, (D) 120 min, and (E) 150 min.....                                                           | S2 |
| <b>Fig. S2</b> SEM photographs of silicalites synthesized in the ethylene glycol bath for (A) 35 min, (B) 60 min, and (C) 90 min and in the microwave oven with an intermediate temperature ramp rate for (D) 35 min, (E) 60 min, and (F) 90 min..... | S3 |
| <b>Fig. S3</b> SEM photographs of silicalites synthesized in electric oven for (A) 55 min, (B) 80 min, and (C) 90 min and in the microwave oven with a slow temperature ramp rate for (D) 55 min, (E) 80 min, and (F) 90 min.....                     | S3 |
| <b>Table S2</b> Comparison of parameters in microwave and conventional heating systems.....                                                                                                                                                           | S4 |

**Table S1** Reaction temperature programs used in the microwave oven for the synthesis of silicalite.

| An intermediate temperature ramp rate |                    |                 | A slow temperature ramp rate |                    |                 |
|---------------------------------------|--------------------|-----------------|------------------------------|--------------------|-----------------|
| Temperature (°C)                      | Ramp rate (°C/min) | Ramp time (min) | Temperature (°C)             | Ramp rate (°C/min) | Ramp time (min) |
| 25~108                                | 8.30               | 10              | 25~100                       | 4.41               | 17              |
| 108~120                               | 4.00               | 3               | 100~120                      | 2.00               | 10              |
| 120~140                               | 2.50               | 8               | 120~130                      | 1.43               | 7               |
| 140~145                               | 0.83               | 6               | 130~140                      | 0.77               | 13              |
| 145~150                               | 0.15               | 33              | 140~150                      | 0.43               | 23              |

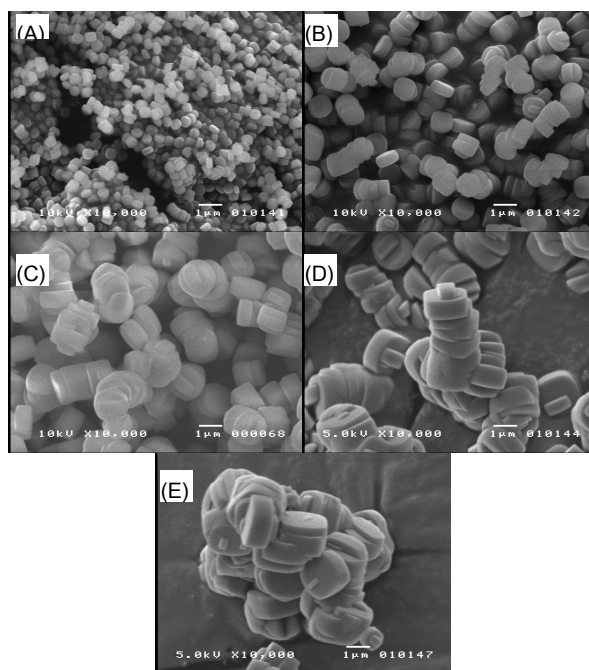

**Fig. S1** SEM photographs of silicalites synthesized in the microwave oven with a fast temperature ramp rate for (A) 30 min, (B) 60 min, (C) 90 min, (D) 120 min, and (E) 150 min.

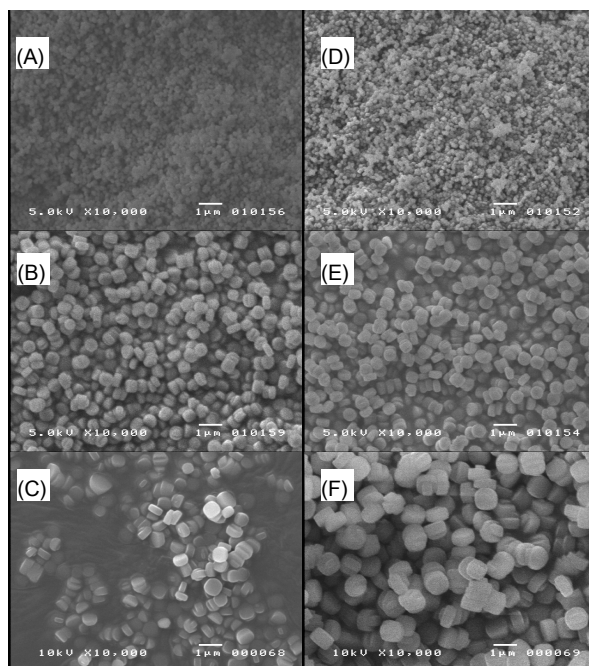

**Fig. S2** SEM photographs of silicalites synthesized in ethylene glycol bath for (A) 35 min, (B) 60 min, and (C) 90 min and in the microwave oven with an intermediate temperature ramp rate for (D) 35 min, (E) 60 min, and (F) 90 min.

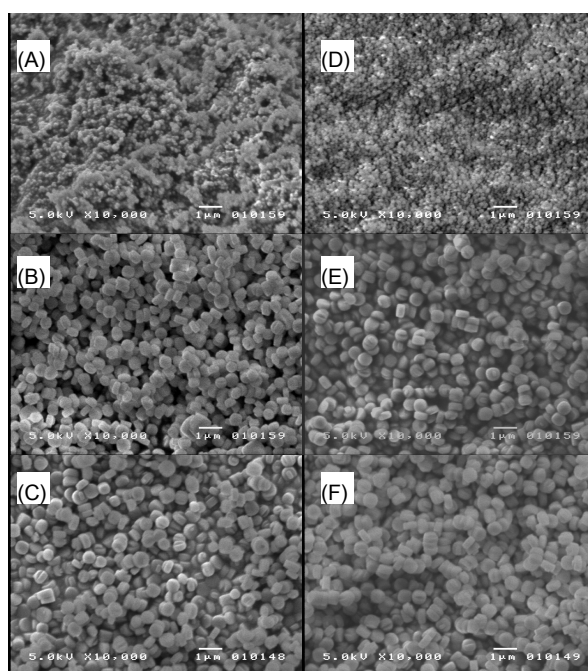

**Fig. S3** SEM photographs of silicalites synthesized in electric oven for (A) 55 min, (B) 80 min, and (C) 90 min and in the microwave oven with a slow temperature ramp rate for (D) 55 min, (E) 80 min, and (F) 90 min.

**Table S2** Comparison of parameters in microwave and conventional heating systems

| <b>System</b>                  | MARS®-5                                                            | Ethylene glycol bath with heating mantle                  | Blue-M oven                                           |
|--------------------------------|--------------------------------------------------------------------|-----------------------------------------------------------|-------------------------------------------------------|
| <b>Manufacturer</b>            | CEM Corp., Mathews, NC                                             | Chem Glass Inc.                                           | Stabiltherm                                           |
| <b>Description</b>             | Microwave oven                                                     | Thermal mantle and bath                                   | Thermal oven                                          |
| <b>Cavity volume</b>           | 420 (width) × 340 (depth) × 330 (height) mm = 47.124 L             | 1L cylindrical glass vessel with 0.6 L of ethylene glycol | 330 (width) x 310 (depth) x 305 (height) mm = 31.20 L |
| <b>Max. power</b>              | 1200 W                                                             | 300 W heater                                              | 1200 W (heaters) and fan and controller               |
| <b>Max. power density</b>      | 25.5 WL <sup>-1</sup>                                              | 67.5 WL <sup>-1</sup>                                     | 38.5 WL <sup>-1</sup>                                 |
| <b>Magnetron</b>               | One magnetron                                                      | -                                                         | -                                                     |
| <b>Irradiation mode</b>        | Multimode                                                          | -                                                         | -                                                     |
| <b>Power delivery</b>          | Controlled to match temperature variable power between 0 and 300 W | PID control, bath temperature preset                      | PID control to set temperature                        |
| <b>Reactor type</b>            | 33mmID, 100 mL vessel                                              | Same as left                                              | Same as left                                          |
| <b>Temperature measurement</b> | Fiberoptic probe in a sapphire thermowell                          | K-type thermocouple                                       | K-type thermocouple                                   |
| <b>Program</b>                 | 2 min ramp, hold for varying times up to 120 min                   | Approx. 45 min ramp to hold temperature, preheated bath   | Approx. 15 min to hold temperature, oven preheated    |
| <b>Max. temp.</b>              | 150°C                                                              | 150°C                                                     | 150°C                                                 |
| <b>Max pressure</b>            | 90 psi at 150°C                                                    | Same as left                                              | Same as left                                          |
| <b>Average power</b>           | 850 W ramp, 250W steady state                                      | 280 W ramp, 150W steady state                             | 1300 W ramp, 600W steady state                        |
| <b>Quantity of reactant</b>    | 20g                                                                | 20g                                                       | 20g                                                   |
